# Supplementary material for: Deep-Ultraviolet (DUV)-Induced Doping in Single Channel Graphene for Pn-Junction
Source: MDPI journal article supplement (doi:10.3390/nano11113003), 2021-11-09
Supplement: s1 [file s1]

## Supplementary Material

# Deep-Ultraviolet (DUV)-Induced Doping in Single Channel Graphene for Pn-Junction

Asif Ali <sup>1</sup>, So-Young Kim <sup>2</sup>, Muhammad Hussain <sup>1</sup>, Syed Hassan Abbas Jaffery <sup>1</sup>, Ghulam Dastgeer <sup>3</sup>, Sajjad Hussain <sup>1</sup>, Bach Thi Phuong Anh <sup>1</sup>, Jonghwa Eom <sup>3</sup>, Byoung Hun Lee <sup>2</sup> and Jongwan Jung <sup>1,\*</sup>

<sup>1</sup> HMC (Hybrid Materials Center) and Department of Nanotechnology and Advanced Materials Engineering, Sejong University, Seoul 05006, Korea; asifmju@gmail.com (A.A.); mhussain@sju.ac.kr (M.H.); hassam@sju.ac.kr (S.H.A.J.); shussainawan@gmail.com (S.H.); bachthiphuonganh@gmail.com (B.T.P.A.)

<sup>2</sup> Center for Semiconductor Technology Convergence, Department of Electrical Engineering, Pohang University of Science and Technology, Cheongam-ro 77, Nam-gu, Pohang 37673, Korea; una0918@postech.ac.kr (S.-Y.K.); bhlee1@postech.ac.kr (B.H.L.)

<sup>3</sup> Department of Physics & Astronomy and Graphene Research Institute-Texas Photonics Center International Research Center (GRI-TPC IRC), Sejong University, Seoul 05006, Korea; gdastgeer@sejong.ac.kr (G.D.); eom@sejong.ac.kr (J.E.)

\* Correspondence: jwjung@sejong.ac.kr

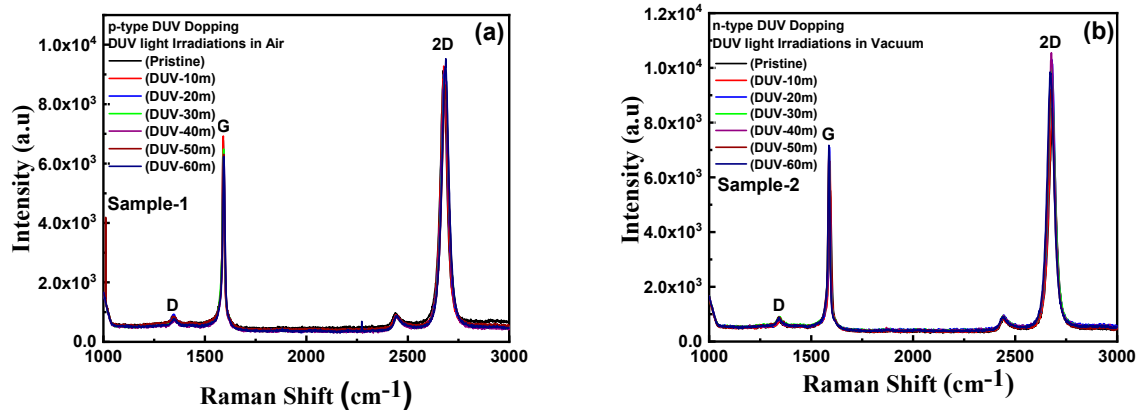

**Figure S1: Raman spectroscopy;** (a) The Raman spectroscopy analysis for sample-1 with different exposure time to induce p-type doping in graphene by DUV irradiations in air, with different exposure times. (b) The Raman spectroscopy analysis for sample-2 with different exposure time to induce p-type doping in graphene by DUV irradiations in vacuum, with different exposure times.

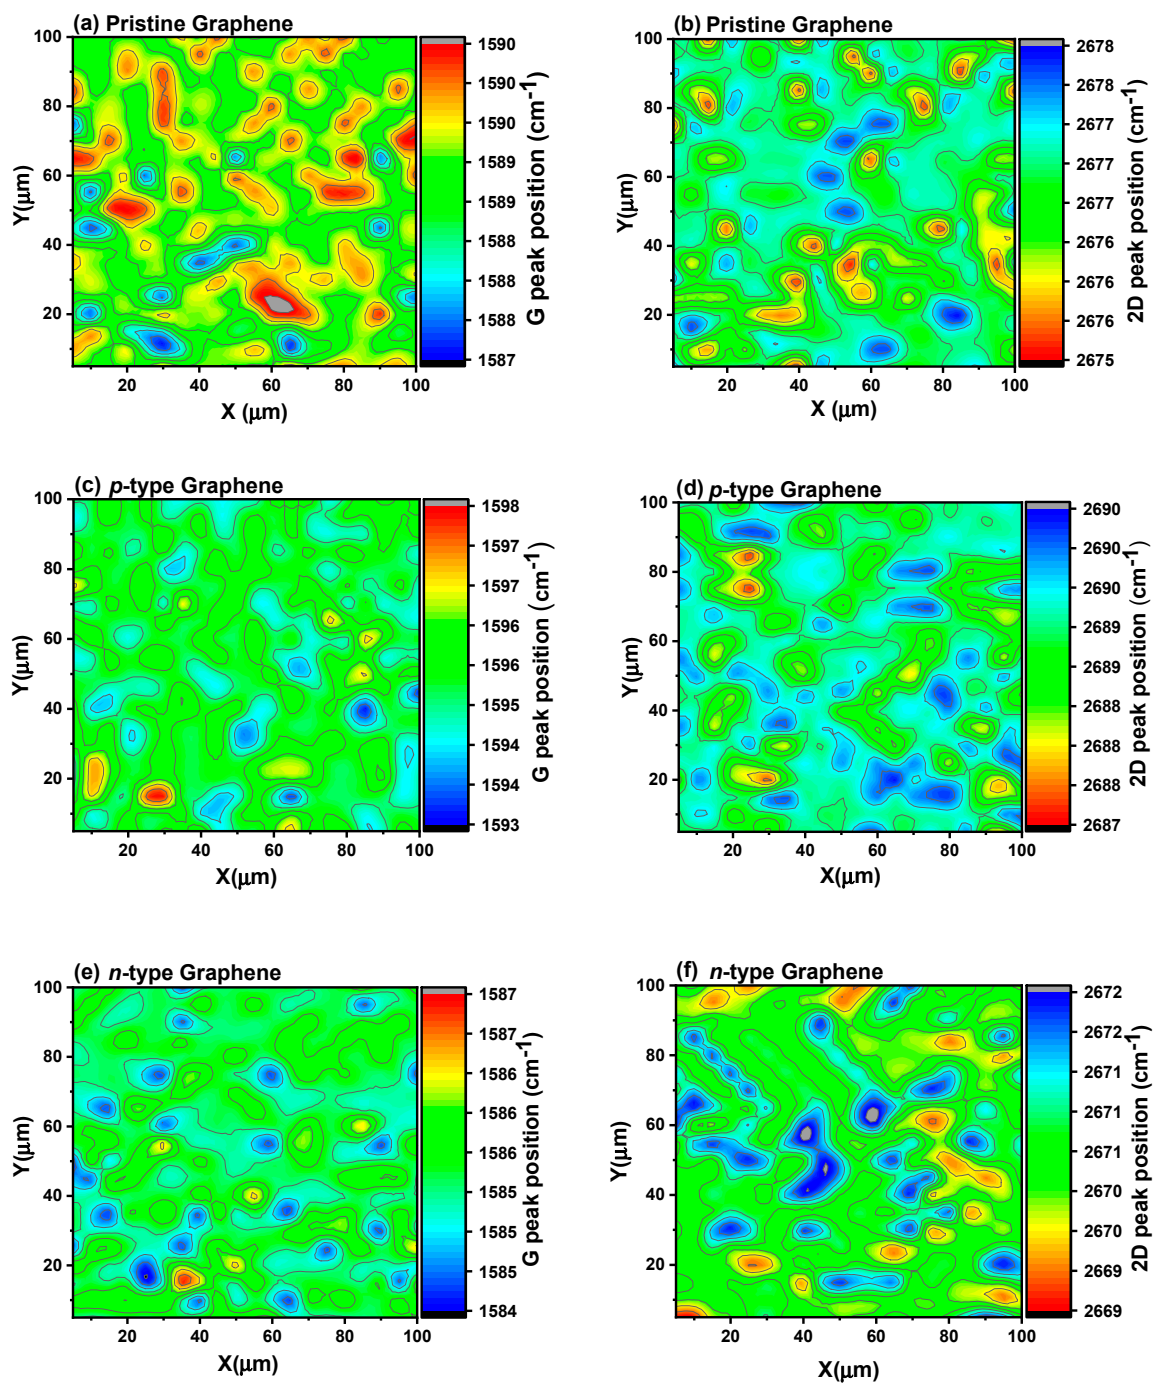

**Figure S2 Raman Mapping:** (a, b) The Raman mapping for G and 2D peak positions for well-defined area of pristine graphene. (c, d) The Raman mapping for G and 2D peak positions for well-defined area of p-type doped graphene under DUV irradiations in air for 60mins. (e, f) The Raman mapping for G and 2D peak positions for well-defined area of n-type doped graphene under DUV irradiations in vacuum for 60mins.

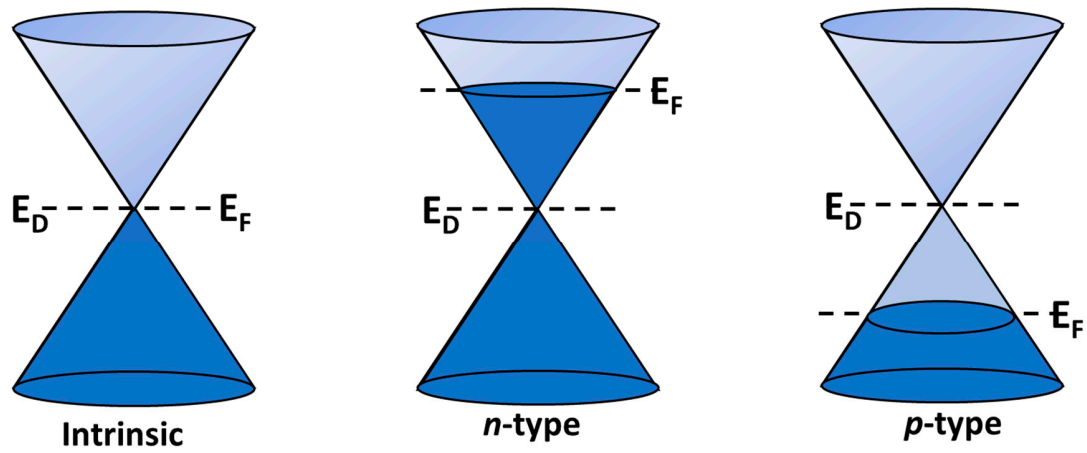

**Figure S3 Energy Band Diagram:** Energy band diagram for pristine, n-type and p-type doped graphene. Depending on the majority charge carrier concentration the  $E_F$  is increased or decreased above or below  $E_D$  for n and p type doped samples, respectively.

**Table-S1: Hall measurement characteristics**

| Characteristics             | <i>p</i> -type<br>Graphene                           | <i>n</i> -type<br>Graphene                            |
|-----------------------------|------------------------------------------------------|-------------------------------------------------------|
| Bulk Carrier Concentration  | $4.77 \times 10^{19} \text{ [}/\text{cm}^3\text{]}$  | $-3.426 \times 10^{15} \text{ [}/\text{cm}^3\text{]}$ |
| Sheet Carrier Concentration | $4.808 \times 10^{12} \text{ [}/\text{cm}^2\text{]}$ | $-3.413 \times 10^8 \text{ [}/\text{cm}^2\text{]}$    |
| Mobility                    | $10.198 \times 10^3 \text{ [cm}^2\text{/Vs]}$        | $7.006 \times 10^3 \text{ [cm}^2\text{/Vs]}$          |
| Sheet Resistance            | $1.084 \times 10^3 \text{ [}\Omega\text{/square]}$   | $2.601 \times 10^3 \text{ [}\Omega\text{/square]}$    |
| Average Hall Coefficient    | $1.298 \times 10^{-1} \text{ [cm}^3\text{/C]}$       | $1.822 \times 10^{-3} \text{ [cm}^3\text{/C]}$        |

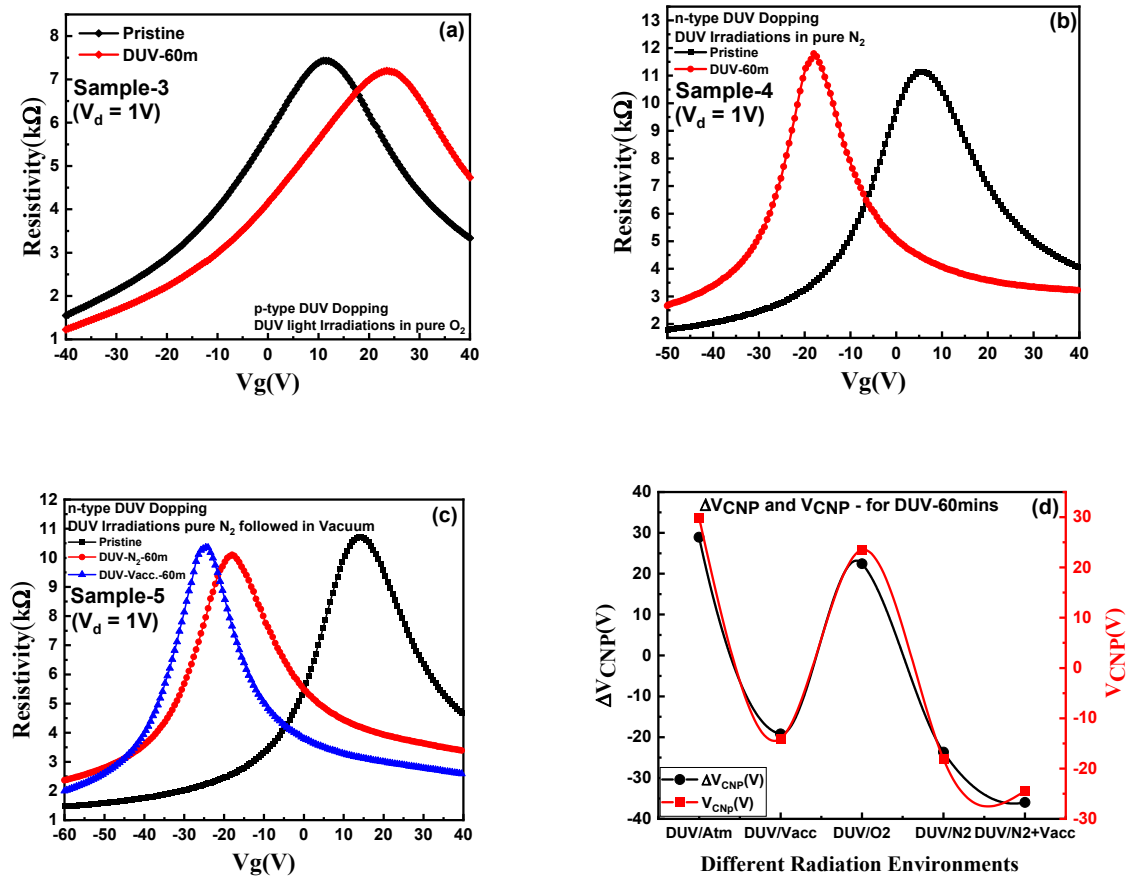

**Figure S4 Transfer characteristics and a shift in charge neutrality points (CNP):** (a) Transfer characteristic with resistivity as a function of  $V_g$  for sample-3 (DUV irradiation in pure  $O_2$ ) illustrating the p-type doping in graphene, for 60 mins of exposure time. (b) Transfer characteristics of sample-4 (DUV irradiations in pure  $N_2$ ), exhibiting n-type doping behavior when exposed to DUV irradiations in pure  $N_2$  environment for 60mins. (c) Transfer characteristics for sample-5 (60 min DUV in pure  $N_2$  followed by 60 mins irradiations in vacuum), exhibiting a high n-type doping effect. (d)  $\Delta V_{CNP}$  (CNP after DUV Doping – CNP Before DUV Doping) and  $V_{CNP}$  for DUV doping under different irradiation environments, showing a higher shift in the CNP position under air conditions in p-type doping and pure  $N_2$  followed by vacuum condition in n-type doping, for 60 mins of DUV exposure time.

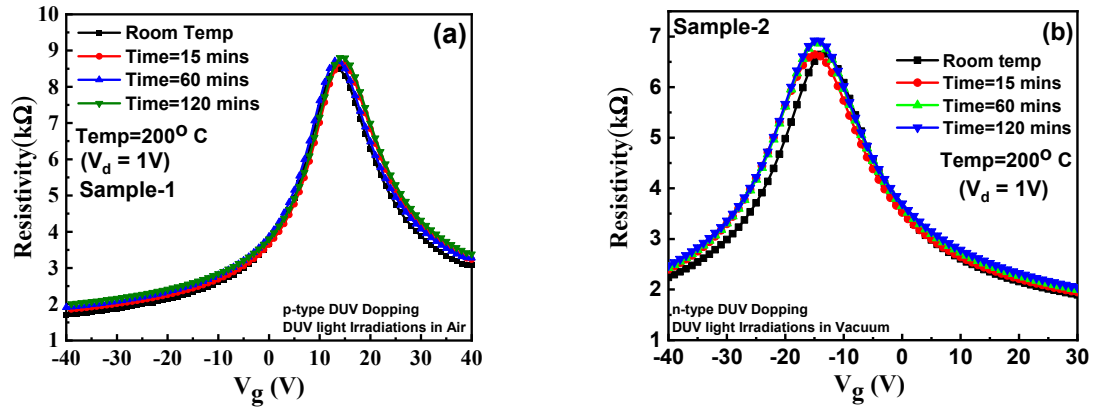

**Figure S5 Stability with heating time:** (a) DUV irradiations in air induced doping state of the device (sample-1) with different heating times, from 15 mins to 120 mins, at a temperature of a 200°C. (b) DUV irradiations in vacuum induced doping state of the device (sample-2) with different heating times, from 15 mins to 120 mins, at a temperature of a 200°C. Both devices exhibit a stable doping state over the different heating times.

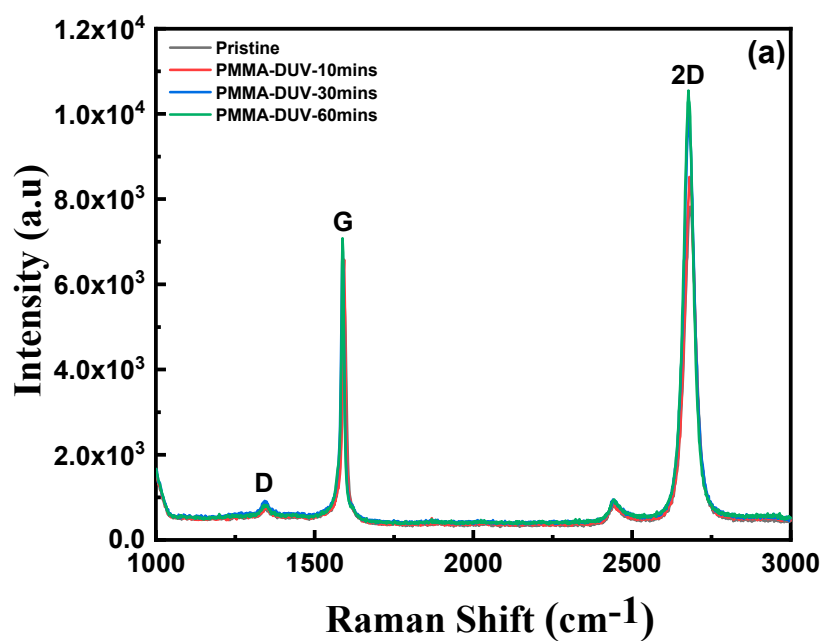

**Figure S6 Raman for PMMA coated graphene:** (a) Raman spectrum of graphene-coated 2548nm thick PMMA and exposed to DUV for different intervals of time, up to 60 mins. No shift in the 2D and G peaks of graphene was observed, as compared to pristine graphene for different exposure times.

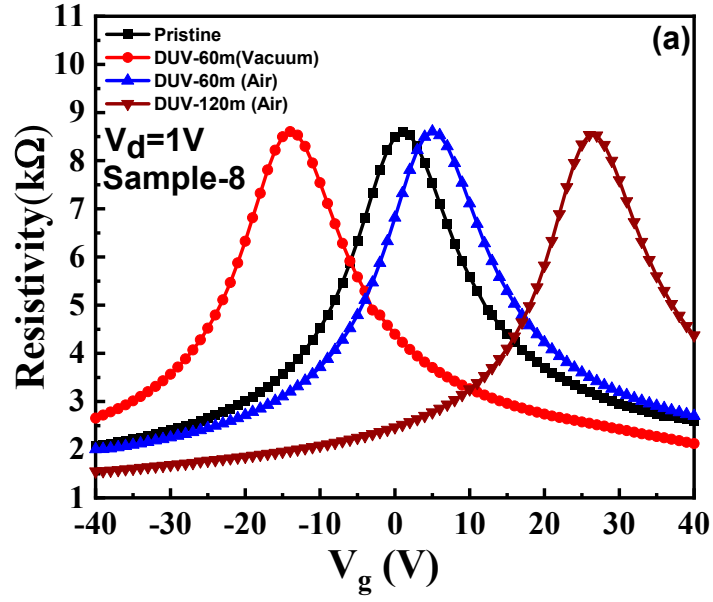

**Figure S7 Transfer characteristics for reversible DUV-Doping:** (a) Transfer characteristics of sample-8 to investigate the reversible nature of DUV induced doping. The device was initially n-type doped, by 60 mins of DUV irradiations in vacuum. Further, the device was exposed to DUV irradiation in air, which exhibits counter doping and high p-type doping was induced, after 120 mins exposure.
